# Supplementary material for: Water extract of green tea attenuates alcohol-related hepatitis by inhibiting liver inflammation and gut microbiota disturbance in mice
Source: Royal Society of Chemistry journal article supplement (doi:10.1039/d3fo03685e), 2023-01-01
Supplement: d3fo03685e4.pdf [file d3fo03685e4.pdf]

A

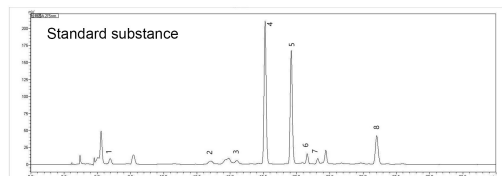

B

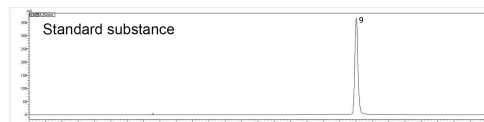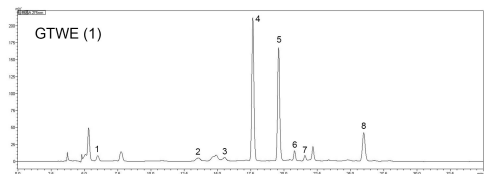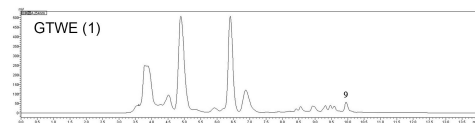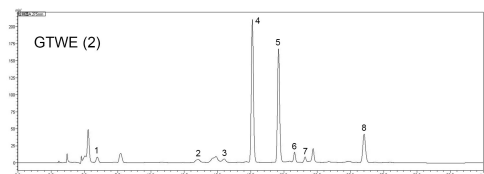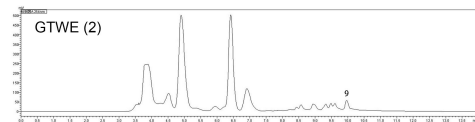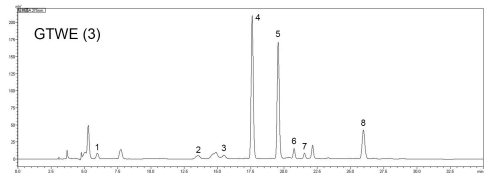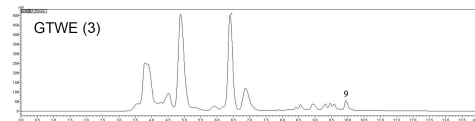

|   |                          |
|---|--------------------------|
| 1 | Galli acid               |
| 2 | Epigallocatechin         |
| 3 | Catechin                 |
| 4 | Caffeine                 |
| 5 | Epigallocatechin gallate |
| 6 | Epicatechin              |
| 7 | Galocatechin gallate     |
| 8 | Epicatechin gallate      |
| 9 | Ellagic acid             |
