# Supplementary material for: Water extract of green tea attenuates alcohol-related hepatitis by inhibiting liver inflammation and gut microbiota disturbance in mice
Source: Royal Society of Chemistry journal article supplement (doi:10.1039/d3fo03685e), 2023-01-01
Supplement: d3fo03685e5.pdf [file d3fo03685e5.pdf]

Table S1. Abbreviations

| Abbreviation | Full name                               |
|--------------|-----------------------------------------|
| ALD          | Alcoholic liver disease                 |
| ARH          | Alcoholic-related hepatitis             |
| BP           | Biological processes                    |
| CA           | Catechin                                |
| CAF          | Caffeine                                |
| CC           | Cellular components                     |
| EC           | Epicatechin                             |
| ECG          | Epicatechin gallate                     |
| EGC          | Epigallocatechin                        |
| EGCG         | Epigallocatechin gallate                |
| GCG          | Gallocatechin gallate                   |
| GO           | Gene Ontology                           |
| GSH          | Glutathione                             |
| GWAE         | Alcohol extract of green tea            |
| GTWE         | Water extract of green tea              |
| HPLC         | High Performance Liquid Chromatography  |
| KEGG         | Kyoto Encyclopedia of Genes and Genomes |
| LPS          | Lipopolysaccharide                      |
| MD2          | Myeloid differentiation factor 2        |
| MF           | Molecular functions                     |

|       |                                                            |
|-------|------------------------------------------------------------|
| MyD88 | Myeloid differentiation marker 88                          |
| PPI   | Protein-protein interaction                                |
| TRAF6 | TNF receptor-associated factor 6                           |
| TRIF  | TIR-domain-containing adaptor inducing interferon- $\beta$ |

Table S2. RT-qPCR primer sequences.

| Gene          | Forward                 | Reverse                 |
|---------------|-------------------------|-------------------------|
| GAPDH         | AGGTCGGTGTGAACGGATTTG   | TGTAGACCATGTAGTTGAGGTCA |
| IL-1 $\beta$  | GCAACTGTTCTGAACTCAACT   | ATCTTTTGGGGTCCGTCAACT   |
| IL-6          | TAGTCCTTCCTACCCCAATTTCC | TTGGTCCTTAGCCACTCCTTC   |
| TNF- $\alpha$ | AGCCGATGGGTTGTACCT      | TGAGTTGGTCCCCCTTCT      |
| Occludin      | TTGAAAGTCCACCTCCTTACAGA | CCGGATAAAAAGAGTACGCTGG  |
| ZO-1          | ACCACCAACCCGAGAAGAC     | CAGGAGTCATGGACGCACA     |
| MUC2          | TTCGGCACGAGCAACTTTG     | GGCAGGACACCTTGTTCATTG   |

Table S3. Components in green Tea

| Component                             | 2D Structure                                                                                                                                                                                                                                                                                                                                                                              | PubChem CID          |
|---------------------------------------|-------------------------------------------------------------------------------------------------------------------------------------------------------------------------------------------------------------------------------------------------------------------------------------------------------------------------------------------------------------------------------------------|----------------------|
| <p><b>Caffeine</b></p>                | 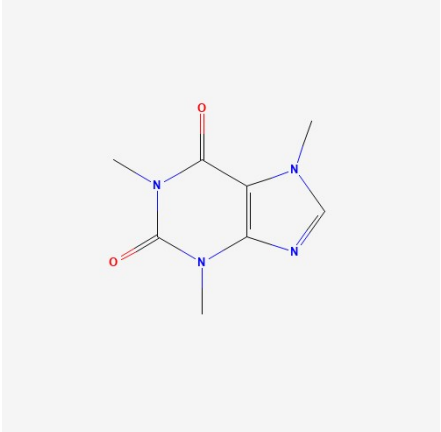 <p>The image shows the 2D chemical structure of caffeine, which is 1,3,7-trimethylxanthine. It consists of a fused pyrimidine-imidazole ring system with three methyl groups attached to the nitrogen atoms and two carbonyl groups.</p>                                                               | <p><b>2519</b></p>   |
| <p><b>Epicatechin</b></p>             |  <p>The image shows the 2D chemical structure of epicatechin, a flavan-3-ol. It features a chromane core with two catechol rings attached at the 2 and 3 positions. The structure includes several hydroxyl groups on the aromatic rings.</p>                                                          | <p><b>72276</b></p>  |
| <p><b>Epicatechin<br/>gallate</b></p> |  <p>The image shows the 2D chemical structure of epicatechin gallate, an ester of epicatechin and gallic acid. It features the epicatechin core with a gallic acid moiety attached to the 3-position of the chromane ring. The gallic acid moiety has three hydroxyl groups on its aromatic ring.</p> | <p><b>107905</b></p> |

|                                         |                                                                                                                                                                                                                                                                                                                                                                                                                                               |                       |
|-----------------------------------------|-----------------------------------------------------------------------------------------------------------------------------------------------------------------------------------------------------------------------------------------------------------------------------------------------------------------------------------------------------------------------------------------------------------------------------------------------|-----------------------|
| <p><b>Gallocatechin<br/>gallate</b></p> | 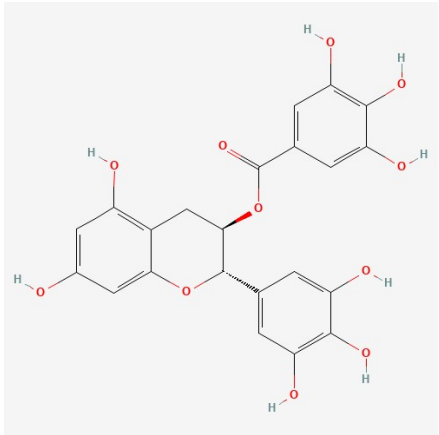 <p>The structure shows a central chromane ring system. The 2-position of the chromane is linked via an ester bond to a gallic acid moiety. The 3-position of the chromane is linked via a carbon-carbon bond to another gallic acid moiety. Each gallic acid moiety consists of a benzene ring with three hydroxyl groups and a carboxylic acid group.</p> | <p><b>199472</b></p>  |
| <p><b>Gallic acid</b></p>               |  <p>The structure shows a benzene ring with three hydroxyl groups at the 2, 4, and 6 positions and a carboxylic acid group at the 1 position.</p>                                                                                                                                                                                                          | <p><b>370</b></p>     |
| <p><b>Catechin</b></p>                  |  <p>The structure shows a central chromane ring system. The 2-position of the chromane is linked via an ester bond to a gallic acid moiety. The 3-position of the chromane is linked via a carbon-carbon bond to another gallic acid moiety.</p>                                                                                                          | <p><b>9064</b></p>    |
| <p><b>Ellagic acid</b></p>              |  <p>The structure shows a naphthalene ring system with two carboxylic acid groups at the 1 and 8 positions and two hydroxyl groups at the 2 and 7 positions.</p>                                                                                                                                                                                          | <p><b>5281855</b></p> |

|                                            |                                                                                                                                                                                                                                                                                                                                                                                                                                                                                                                                                                                                        |                     |
|--------------------------------------------|--------------------------------------------------------------------------------------------------------------------------------------------------------------------------------------------------------------------------------------------------------------------------------------------------------------------------------------------------------------------------------------------------------------------------------------------------------------------------------------------------------------------------------------------------------------------------------------------------------|---------------------|
| <p><b>Epigallocatechin</b></p>             | 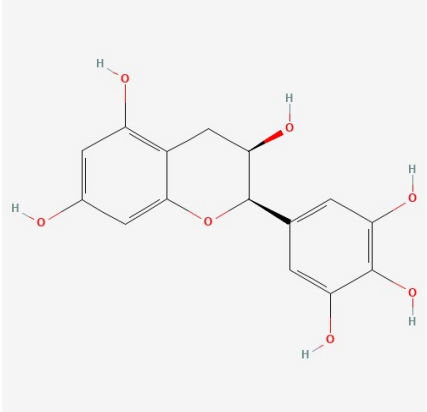 <p>The image shows the chemical structure of Epigallocatechin. It consists of a flavan-3-ol core, specifically a catechin, with two gallic acid units attached. One gallic acid unit is attached to the C2 position of the chromane ring system, and the other is attached to the C3 position. The gallic acid units are shown as phenyl rings with three hydroxyl groups each. The hydroxyl groups are represented as H-O.</p>                                                                                     | <p><b>72277</b></p> |
| <p><b>Epigallocatechin<br/>gallate</b></p> |  <p>The image shows the chemical structure of Epigallocatechin gallate. It is a dimeric polyphenol consisting of an epigallocatechin unit and a gallic acid unit. The epigallocatechin unit is a flavan-3-ol core with two gallic acid units attached to the C2 and C3 positions. The gallic acid unit is attached to the C3 position of the epigallocatechin unit via an ester linkage. The gallic acid unit is shown as a phenyl ring with three hydroxyl groups. The hydroxyl groups are represented as H-O.</p> | <p><b>65064</b></p> |

Table S4. Content of compounds in GTAE and GTWE

| Component                | GTWE( $\mu\text{g}/\text{mg}$ ) |
|--------------------------|---------------------------------|
| Galli acid               | 1.5 $\pm$ 0.01                  |
| Epigallocatechin         | 12.35 $\pm$ 0.27                |
| Catechin                 | 6.57 $\pm$ 0.04                 |
| Caffeine                 | 20.49 $\pm$ 0.17                |
| Epigallocatechin gallate | 32.23 $\pm$ 0.27                |
| Epicatechin              | 6.24 $\pm$ 0.11                 |
| Gallocatechin gallate    | 3.01 $\pm$ 0.09                 |
| Epicatechin gallate      | 9.03 $\pm$ 0.03                 |
| Ellagic acid             | 1.43 $\pm$ 0.02                 |

Table S5. The binding energy of active components and core target

|           | $\Delta\text{G}(\text{kcal}/\text{mol})$ | $\text{Kd}(\text{mol}/\text{L})$ | $\text{KJ}/\text{mol}$ |
|-----------|------------------------------------------|----------------------------------|------------------------|
| CAF_TLR4  | -4.81                                    | 4.06 $\times 10^{-4}$            | -20.13                 |
| EC_TLR4   | -5.32                                    | 1.77 $\times 10^{-4}$            | -22.26                 |
| ECG_TLR4  | -3.72                                    | 2.38 $\times 10^{-4}$            | -15.56                 |
| EGC_TLR4  | -4.45                                    | 7.29 $\times 10^{-4}$            | -18.62                 |
| EGCG_TLR4 | -0.57                                    | 3.96 $\times 10^{-1}$            | -2.39                  |
| GCG_TLR4  | -2.44                                    | 1.90 $\times 10^{-2}$            | -10.21                 |
| CC_TLR4   | -6.39                                    | 3.12 $\times 10^{-5}$            | -26.74                 |
