# Supplementary figures and images for: Water extract of green tea attenuates alcohol-related hepatitis by inhibiting liver inflammation and gut microbiota disturbance in mice
Source: Royal Society of Chemistry journal article supplement (doi:10.1039/d3fo03685e), 2023-01-01

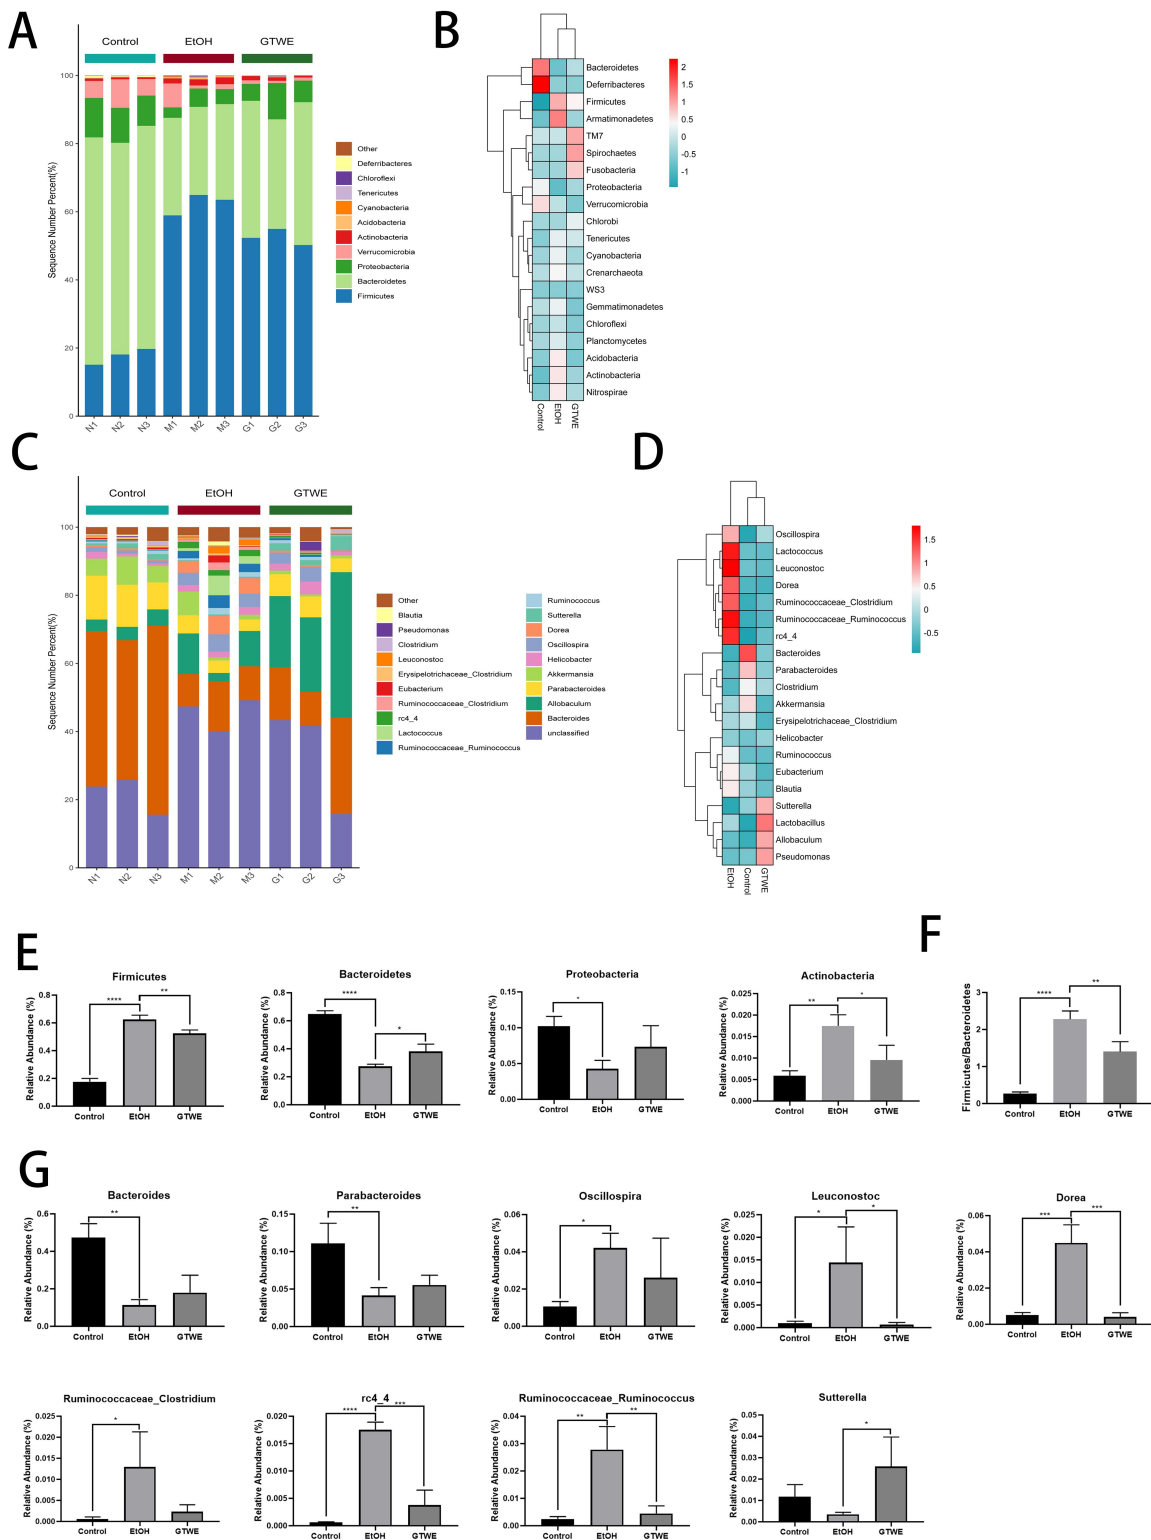

Supplement: d3fo03685e2.pdf [file d3fo03685e2.pdf]

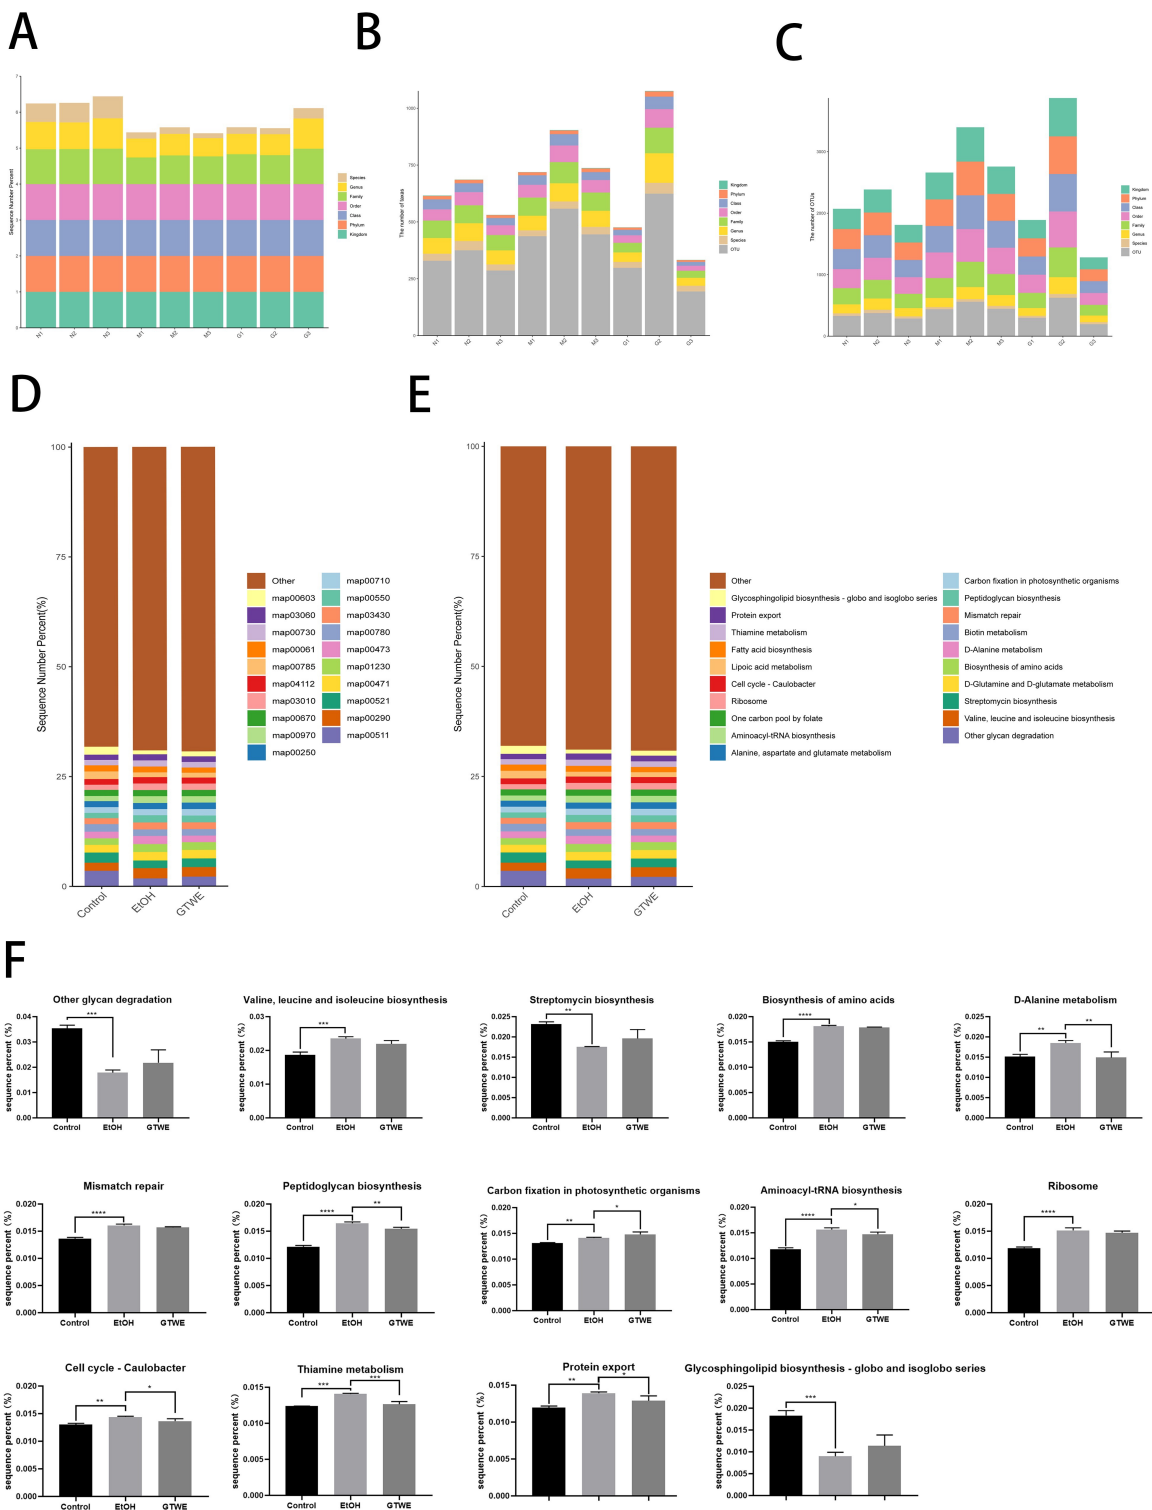

Supplement: d3fo03685e3.pdf [file d3fo03685e3.pdf]
